# Supplementary material for: Selective binding of the PHD6 finger of MLL4 to histone H4K16ac links MLL4 and MOF
Source: PubMed Central journal article supplement (PMC6534582; doi:10.1038/s41467-019-10324-8), 2019-05-24
Supplement: 41467_2019_10324_MOESM3_ESM.pdf [file 41467_2019_10324_MOESM3_ESM.pdf]

## Reporting Summary

Nature Research wishes to improve the reproducibility of the work that we publish. This form provides structure for consistency and transparency in reporting. For further information on Nature Research policies, see [Authors & Referees](#) and the [Editorial Policy Checklist](#).

### Statistical parameters

When statistical analyses are reported, confirm that the following items are present in the relevant location (e.g. figure legend, table legend, main text, or Methods section).

n/a Confirmed

- The exact sample size ( $n$ ) for each experimental group/condition, given as a discrete number and unit of measurement
- An indication of whether measurements were taken from distinct samples or whether the same sample was measured repeatedly
- The statistical test(s) used AND whether they are one- or two-sided  
*Only common tests should be described solely by name; describe more complex techniques in the Methods section.*
- A description of all covariates tested
- A description of any assumptions or corrections, such as tests of normality and adjustment for multiple comparisons
- A full description of the statistics including central tendency (e.g. means) or other basic estimates (e.g. regression coefficient) AND variation (e.g. standard deviation) or associated estimates of uncertainty (e.g. confidence intervals)
- For null hypothesis testing, the test statistic (e.g.  $F$ ,  $t$ ,  $r$ ) with confidence intervals, effect sizes, degrees of freedom and  $P$  value noted  
*Give  $P$  values as exact values whenever suitable.*
- For Bayesian analysis, information on the choice of priors and Markov chain Monte Carlo settings
- For hierarchical and complex designs, identification of the appropriate level for tests and full reporting of outcomes
- Estimates of effect sizes (e.g. Cohen's  $d$ , Pearson's  $r$ ), indicating how they were calculated
- Clearly defined error bars  
*State explicitly what error bars represent (e.g. SD, SE, CI)*

*Our web collection on [statistics for biologists](#) may be useful.*

### Software and code

Policy information about [availability of computer code](#)

Data collection NMR experiments were carried out at 298K on Varian INOVA 600 and 900 MHz spectrometers at the UC Denver NMR Core facility

Data analysis CcpNmr Suite, Amber16, and other software listed in the Method section. Software for ChIP-seq analysis include bowtie2; SICER algorithm, GREAT v3, SeqPos listed in Method section.

For manuscripts utilizing custom algorithms or software that are central to the research but not yet described in published literature, software must be made available to editors/reviewers upon request. We strongly encourage code deposition in a community repository (e.g. GitHub). See the Nature Research [guidelines for submitting code & software](#) for further information.

### Data

Policy information about [availability of data](#)

All manuscripts must include a [data availability statement](#). This statement should provide the following information, where applicable:

- Accession codes, unique identifiers, or web links for publicly available datasets
- A list of figures that have associated raw data
- A description of any restrictions on data availability

The atomic coordinates and NMR assignments of MLL4-PHD6 in complex with H4K16ac peptide have been deposited in the Protein Data Bank under the accession

codes 607G. The ChIP-seq data is submitted to Gene Expression Omnibus under the accession number is GSE130091. Other data are available from the corresponding author upon reasonable request.

## Field-specific reporting

Please select the best fit for your research. If you are not sure, read the appropriate sections before making your selection.

Life sciences  Behavioural & social sciences  Ecological, evolutionary & environmental sciences

For a reference copy of the document with all sections, see [nature.com/authors/policies/ReportingSummary-flat.pdf](https://www.nature.com/authors/policies/ReportingSummary-flat.pdf)

## Life sciences study design

All studies must disclose on these points even when the disclosure is negative.

|                 |                                                                 |
|-----------------|-----------------------------------------------------------------|
| Sample size     | <input type="text" value="present in relevant figure legends"/> |
| Data exclusions | <input type="text" value="no data exclusions"/>                 |
| Replication     | <input type="text" value="present in relevant figure legends"/> |
| Randomization   | <input type="text" value="no randomization"/>                   |
| Blinding        | <input type="text" value="no blinding"/>                        |

## Reporting for specific materials, systems and methods

### Materials & experimental systems

| n/a                                 | Involvement in the study                                  |
|-------------------------------------|-----------------------------------------------------------|
| <input checked="" type="checkbox"/> | <input type="checkbox"/> Unique biological materials      |
| <input type="checkbox"/>            | <input checked="" type="checkbox"/> Antibodies            |
| <input type="checkbox"/>            | <input checked="" type="checkbox"/> Eukaryotic cell lines |
| <input checked="" type="checkbox"/> | <input type="checkbox"/> Palaeontology                    |
| <input checked="" type="checkbox"/> | <input type="checkbox"/> Animals and other organisms      |
| <input checked="" type="checkbox"/> | <input type="checkbox"/> Human research participants      |

### Methods

| n/a                                 | Involvement in the study                        |
|-------------------------------------|-------------------------------------------------|
| <input type="checkbox"/>            | <input checked="" type="checkbox"/> ChIP-seq    |
| <input checked="" type="checkbox"/> | <input type="checkbox"/> Flow cytometry         |
| <input checked="" type="checkbox"/> | <input type="checkbox"/> MRI-based neuroimaging |

## Antibodies

Antibodies used

Antibodies used for ChIP are described in the ChIP-seq report section. Antibodies used for other assays: anti-MLL4#336 and anti-UTX37. Anti-MOF (A300-992A) and anti-RbBP5 (A300-109A) were from Bethyl Laboratories. Anti-H3 (ab1791), anti-H3K4me1 (ab8895), and anti-H4 (ab7311) were from Abcam. Anti-H3K4me3 (07-473), anti-H4K8ac (07-328), and anti-H4K16ac (07-329) were from Millipore. Anti-PARP1 (556362) were from BD bioscience. Anti-MYC (sc40) was from Santa Cruz.

Validation

All antibodies validation are available on the manufacturers' websites.

## Eukaryotic cell lines

Policy information about [cell lines](#)

Cell line source(s)

Mouse strains and cell lines are generated and listed in the method section.

Authentication

Describe the authentication procedures for each cell line used OR declare that none of the cell lines used were authenticated.

Mycoplasma contamination

Confirm that all cell lines tested negative for mycoplasma contamination OR describe the results of the testing for mycoplasma contamination OR declare that the cell lines were not tested for mycoplasma contamination.

Commonly misidentified lines  
(See [ICLAC](#) register)

Name any commonly misidentified cell lines used in the study and provide a rationale for their use.

## ChIP-seq

### Data deposition

- Confirm that both raw and final processed data have been deposited in a public database such as [GEO](#).
- Confirm that you have deposited or provided access to graph files (e.g. BED files) for the called peaks.

#### Data access links

*May remain private before publication.*

<https://www.ncbi.nlm.nih.gov/geo/query/acc.cgi?acc=GSE130091>

#### Files in database submission

Mof\_CreER\_Vec\_D-3\_Mock\_MLL4.fastq.gz  
Mof\_CreER\_WT\_rMof\_D-3\_4OHT\_MLL4.fastq.gz  
Mof\_CreER\_Vec\_D-3\_4OHT\_Input.fastq.gz  
Mof\_CreER\_K274R\_rMof\_D-3\_4OHT\_Input.fastq.gz  
Mof\_CreER\_Vec\_D-3\_4OHT\_H4K16ac.fastq.gz  
Mof\_CreER\_K274R\_rMof\_D-3\_4OHT\_H4K16ac.fastq.gz  
Mof\_CreER\_Vec\_D-3\_4OHT\_MLL4.fastq.gz  
Mof\_CreER\_WT\_rMof\_D-3\_4OHT\_Input.fastq.gz  
Mof\_CreER\_K274R\_rMof\_D-3\_4OHT\_MLL4.fastq.gz  
Mof\_CreER\_Vec\_D-3\_Mock\_H4K16ac.fastq.gz  
Mof\_CreER\_WT\_rMof\_D-3\_4OHT\_H4K16ac.fastq.gz  
Mof\_CreER\_Vec\_D-3\_Mock\_Input.fastq.gz  
Mof\_CreER\_Vec\_D-3\_Mock\_MLL4\_sorted-W50-G50-FDR1E-10-islandfiltered-normalized.wig  
Mof\_CreER\_WT\_rMof\_D-3\_4OHT\_MLL4\_sorted-W50-G50-FDR1E-10-islandfiltered-normalized.wig  
Mof\_CreER\_K274R\_rMof\_D-3\_4OHT\_H4K16ac\_sorted-W200-G200-FDR1E-3-islandfiltered-normalized.wig  
Mof\_CreER\_Vec\_D-3\_4OHT\_H4K16ac\_sorted-W200-G200-FDR1E-3-islandfiltered-normalized.wig  
Mof\_CreER\_Vec\_D-3\_4OHT\_MLL4\_sorted-W50-G50-FDR1E-10-islandfiltered-normalized.wig  
Mof\_CreER\_WT\_rMof\_D-3\_4OHT\_H4K16ac\_sorted-W200-G200-FDR1E-3-islandfiltered-normalized.wig  
Mof\_CreER\_K274R\_rMof\_D-3\_4OHT\_MLL4\_sorted-W50-G50-FDR1E-10-islandfiltered-normalized.wig  
Mof\_CreER\_Vec\_D-3\_Mock\_H4K16ac\_sorted-W200-G200-FDR1E-3-islandfiltered-normalized.wig

#### Genome browser session

(e.g. [UCSC](#))

no longer applicable

### Methodology

#### Replicates

ChIP-Seq data are from single experiment.

#### Sequencing depth

Sequencing was done at 50bp, single-ended.

#### Antibodies

anti-H4K16ac (Millipore, 07-329)  
anti-MLL4 (home-made)

#### Peak calling parameters

For MLL4 peak calling, a window size of 50 bp and a gap size of 50 bp was used. For H4K16ac, a window size of 200 bp and a gap size of 200 bp was used.

#### Data quality

For MLL4, peaks with  $FDR < 1E-10$  were included in the data analysis. For H4K16ac,  $FDR < 1E-3$  were included.

#### Software

Software for ChIP-seq analysis include bowtie2; SICER algorithm, GREAT v3, SeqPos listed in Method section.
